# Supplementary material for: Modelling Food and Population Dynamics in Honey Bee Colonies
Source: PubMed Central journal article supplement (PMC3647073; doi:10.1371/journal.pone.0059084), 2013-05-07
Supplement: pone.0059084.s001.pdf [file pone.0059084.s001.pdf]

1 **Appendix: Equations for steady states and critical parameter values.**

2

3 When food increases indefinitely (that is,  $f \rightarrow \infty$  as  $t \rightarrow \infty$ ) then  $f^2/(f^2+b^2) \approx 1$  and  
 4  $b^2/(f^2+b^2) \approx 0$  so that the equations for the rates of change of the populations of brood, hive  
 5 bees and foragers, respectively are approximated by

6

$$7 \quad \frac{dB}{dt} = L \frac{H}{H+v} - \phi B \quad (A1)$$

$$8 \quad \frac{dH}{dt} = \phi B(t - \tau) - H \left( \alpha_{\min} - \sigma \frac{F}{F+H} \right) \quad (A2)$$

$$9 \quad \frac{dF}{dt} = H \left( \alpha_{\min} - \sigma \frac{F}{F+H} \right) - mF. \quad (A3)$$

10

11

(See also equation (8) in the main text.) When (A1), (A2) and (A3) are at steady state then:

12

$$13 \quad F = \frac{LQ - mv}{mQ}, \quad H = QF \quad \text{and} \quad B = \frac{m}{\phi} F \quad (A4)$$

14

15 where  $Q$  is the larger solution of the following quadratic equation:

16

$$17 \quad \alpha_{\min} Q^2 + (\alpha_{\min} - \sigma - m)Q - m = 0. \quad (A5)$$

18

19 When food does not increase indefinitely but approaches a steady state value then the steady  
 20 state are the solutions of equations (1), (3), (4) and (7) using functions (2) and (5) when

21  $\frac{dB}{dt} = \frac{dH}{dt} = \frac{dF}{dt} = \frac{df}{dt} = 0$ . The steady state values for food stores, and forager, hive bee and

22 brood populations are:

23

$$24 \quad f = b \sqrt{\frac{\alpha_{\max}}{\frac{\sigma}{P+1} - \frac{m}{P} - \alpha_{\min}} - 1}, \quad F = \frac{Lf^2}{m(f^2 + b^2)} - \frac{v}{P}, \quad H = PF \quad \text{and} \quad B = \frac{m}{\phi} F \quad (A6)$$

25

26 where

$$27 \quad P = \frac{c}{\gamma_A} - 1 - \frac{\gamma_B m}{\gamma_A \phi}. \quad (A7)$$

28 The hive goes extinct at the critical death rate

29

$$30 \quad m = \frac{\phi\gamma_A}{\gamma_B} \left( \frac{c}{\gamma_A} - 1 \right) \quad (\text{A8})$$

31

32 where  $P$  becomes negative. Food ceases to be limiting and goes to infinity at steady state

33 when the denominator in the steady state expression for  $f$  in (A6) goes to zero; that is when

34  $\frac{\sigma}{P+1} - \frac{m}{P} - \alpha_{\min} = 0$ . This occurs when  $m$  is a root of the equation

35

$$36 \quad \left( \frac{\gamma_B}{\gamma_A \phi} \right) m^2 - \left( \frac{\sigma\gamma_B}{\gamma_A \phi} - \frac{c}{\gamma_A} \right) m + \alpha_{\min} + \alpha_{\max} + \sigma - \frac{\sigma c}{\gamma_A} = 0. \quad (\text{A6})$$

37

38

39

40

41
